# Supplementary material
Source: PubMed Central journal article supplement (PMC3977613)
Supplement: NIHMS562539-supplement-01.pdf [file NIHMS562539-supplement-01.pdf]

| Table S1A Means and SD of Fractional Anisotropy (x1000) in Fiber Bundles |                         |                               |
|--------------------------------------------------------------------------|-------------------------|-------------------------------|
| Fiber Tract                                                              | EOS<br>(n=34)<br>M (SD) | EOS + CUD<br>(n=21)<br>M (SD) |
| L. cingulum                                                              | 462 (38)                | 455 (31)                      |
| R. cingulum                                                              | 443 (26)                | 448 (28)                      |
| L. superior longitudinal fasciculus                                      | 464 (23)                | 464 (25)                      |
| R. superior longitudinal fasciculus                                      | 466 (23)                | 465 (34)                      |
| L. corticospinal                                                         | 583 (30)                | 579 (27)                      |
| R. corticospinal                                                         | 577 (26)                | 574 (27)                      |
| L. inferior longitudinal fasciculus                                      | 462 (23)                | 465 (30)                      |
| R. inferior longitudinal fasciculus                                      | 470 (24)                | 478 (32)                      |
| L. inferior fronto-occipital fasciculus                                  | 514 (24)                | 512 (29)                      |
| R. inferior fronto-occipital fasciculus                                  | 526 (26)                | 520 (35)                      |
| L. uncinate                                                              | 387 (21)                | 378 (24)                      |
| R. uncinate                                                              | 413 (27)                | 407 (29)                      |

Note: Multivariate tests (Wilk's lambda): Wide Range Achievement Test score<sup>32</sup>: F=1.01,  $p=.46$ ; Sex: F=.48,  $p=.91$ ; Age: F=1.37,  $p=.22$ ; Positive urine analysis for cannabis: F=.54,  $p=.88$ . CHR=clinical high-risk for schizophrenia; EOS=early-onset schizophrenia, with and without comorbid cannabis use disorder (CUD); HC=healthy controls; L=left; R=right.

Table S1B Means and SD of Fractional Anisotropy (x1000) in Fiber Bundles, Excluding Individuals With a Comorbid Cannabis Use Disorder (CUD)

|                                         | HC<br>(n=55)<br>M (SD) | CUD<br>(n=31)<br>M (SD) | CHR<br>(n=20)<br>M (SD) | EOS<br>(n=34)<br>M (SD) | F (df=3, 141) |
|-----------------------------------------|------------------------|-------------------------|-------------------------|-------------------------|---------------|
| Fiber Tract                             |                        |                         |                         |                         |               |
| L. cingulum                             | 456 (34)               | 480 (29)                | 458 (39)                | 463 (38)                |               |
| R. cingulum                             | 441 (32)               | 451 (30)                | 439 (34)                | 444 (25)                |               |
| L. superior longitudinal fasciculus     | 468 (29)               | 468 (22)                | 458 (22)                | 464 (23)                |               |
| R. superior longitudinal fasciculus     | 472 (32)               | 470 (29)                | 462 (30)                | 466 (23)                |               |
| L. corticospinal                        | 599 (24)               | 599 (25)                | 582 (25) <sup>a,b</sup> | 582 (29) <sup>a,b</sup> | 4.48**        |
| R. corticospinal                        | 590 (23)               | 587 (19)                | 570 (29) <sup>a,b</sup> | 577 (26) <sup>a</sup>   | 5.46**        |
| L. inferior longitudinal fasciculus     | 480 (24)               | 474 (24)                | 463 (27) <sup>a</sup>   | 462 (23) <sup>a,b</sup> | 4.69**        |
| R. inferior longitudinal fasciculus     | 486 (30)               | 476 (26)                | 477 (24)                | 470 (23)                |               |
| L. inferior fronto-occipital fasciculus | 529 (25)               | 522 (22)                | 511 (23) <sup>a</sup>   | 514 (24) <sup>a</sup>   | 5.10**        |
| R. inferior fronto-occipital fasciculus | 534 (22)               | 530 (23)                | 523 (25)                | 526 (29)                |               |
| L. uncinate                             | 382 (36)               | 383 (30)                | 377 (24)                | 388 (20)                |               |
| R. uncinate                             | 410 (26)               | 415 (28)                | 406 (29)                | 413 (26)                |               |

Note: Multivariate tests (Wilk's lambda): Wide Range Achievement Test score<sup>32</sup>:  $F=1.32, p=.22$ ; Sex:  $F=1.06, p=.40$ ; Age:  $F=1.38, p=.18$ , Positive urine analysis for cannabis:  $F=.89, p=.56$ . CHR=clinical high-risk for schizophrenia; EOS=early-onset schizophrenia, with and without comorbid CUD; L=left; R=right.

<sup>a</sup>Significant difference from healthy controls (HC):  $p < .05$ .

<sup>b</sup>Significant difference from CUD:  $p < .05$ .

\*\* $p < .01$

Table S1C Means and SD of Fractional Anisotropy (x1000) in Fiber Bundles Excluding Cannabis Use Disorder (CUD) Individuals Taking Antipsychotic Drugs

|                                         | HC<br>(n=55)<br>M (SD) | CUD<br>(n=25)<br>M (SD) | CHR<br>(n=21)<br>M (SD) | EOS<br>(n=55)<br>M (SD) | F (df=3, 162) |
|-----------------------------------------|------------------------|-------------------------|-------------------------|-------------------------|---------------|
| Fiber Tract                             |                        |                         |                         |                         |               |
| L. cingulum                             | 456 (34)               | 482 (32)                | 458 (38)                | 459 (35)                |               |
| R. cingulum                             | 441 (32)               | 453 (32)                | 438 (34)                | 445 (26)                |               |
| L. superior longitudinal fasciculus     | 468 (29)               | 467 (23)                | 458 (21)                | 464 (23)                |               |
| R. superior longitudinal fasciculus     | 472 (32)               | 466 (31)                | 462 (29)                | 466 (27)                |               |
| L. corticospinal                        | 599 (24)               | 598 (26)                | 583 (25) <sup>a</sup>   | 581 (29) <sup>a,b</sup> | 5.25**        |
| R. corticospinal                        | 590 (23)               | 587 (21)                | 570 (28) <sup>a,b</sup> | 576 (26) <sup>a</sup>   | 5.88**        |
| L. inferior longitudinal fasciculus     | 480 (24)               | 476 (25)                | 462 (27) <sup>a</sup>   | 463 (26) <sup>a,b</sup> | 4.47**        |
| R. inferior longitudinal fasciculus     | 486 (30)               | 476 (28)                | 476 (24)                | 473 (27)                |               |
| L. inferior fronto-occipital fasciculus | 529 (25)               | 522 (23)                | 511 (23) <sup>a</sup>   | 513 (26) <sup>a</sup>   | 5.52**        |
| R. inferior fronto-occipital fasciculus | 534 (22)               | 532 (24)                | 523 (24)                | 524 (29)                |               |
| L. uncinate                             | 382 (36)               | 386 (31)                | 376 (24)                | 384 (22)                |               |
| R. uncinate                             | 410 (26)               | 415 (29)                | 405 (29)                | 411 (28)                |               |

Note: Multivariate tests (Wilk's lambda): Wide Range Achievement Test score [ENREF 1](#)<sup>32</sup>: F=1.22, p=.21; Sex: F=1.05, p=.41; Age: F=1.33, p=.21, Positive urine analysis for cannabis: F=1.15, p=.32. CHR=clinical high-risk for schizophrenia; EOS=early-onset schizophrenia, with and without comorbid CUD; L=left; R = right.

<sup>a</sup>Significant difference from healthy controls (HC):  $p < .05$ .

<sup>b</sup>Significant difference from CUD:  $p < .05$ .

\*\* $p < .01$

Table S1D Means and SD of Fractional Anisotropy (x1000) in Fiber Bundles Including Lifetime Antipsychotic Exposure as a Covariate.

|                                         | HC<br>(n=55)<br>M (SD) | CUD<br>(n=25)<br>M (SD) | CHR<br>(n=21)<br>M (SD) | EOS<br>(n=55)<br>M (SD) | F (df=3, 153) |
|-----------------------------------------|------------------------|-------------------------|-------------------------|-------------------------|---------------|
| Fiber Tract                             |                        |                         |                         |                         |               |
| L. corticospinal                        | 599 (24)               | 599 (25)                | 583 (25) <sup>a,b</sup> | 581 (29) <sup>a,b</sup> | 4.33**        |
| R. corticospinal                        | 590 (23)               | 587 (19)                | 570 (28) <sup>a,b</sup> | 576 (26) <sup>a,b</sup> | 4.75**        |
| L. inferior longitudinal fasciculus     | 480 (24)               | 474 (24)                | 462 (27) <sup>a</sup>   | 463 (26) <sup>a</sup>   | 3.91*         |
| L. inferior fronto-occipital fasciculus | 529 (25)               | 522 (22)                | 511 (23) <sup>a</sup>   | 513 (26) <sup>a</sup>   | 4.60**        |

Note: Multivariate tests (Wilk's lambda): Lifetime antipsychotic exposure in chlorpromazine equivalents<sup>25</sup>:  $F=.36$ ,  $p=.836$ ;

Wide Range Achievement Test score [ENREF 1](#)<sup>32</sup>:  $F=1.26$ ,  $p=.29$ ; Sex:  $F=1.70$ ,  $p=.16$ ; Age:  $F=1.06$ ,  $p=.38$ ; Positive urine analysis for cannabis:  $F=1.05$ ,  $p=.38$ . CHR=clinical high-risk for schizophrenia; EOS=early-onset schizophrenia, with and without comorbid cannabis use disorder (CUD); L=left; R=right.

<sup>a</sup>Significant difference from healthy controls (HC):  $p<.05$ .

<sup>b</sup>Significant difference from CUD:  $p<.05$ .

\* $p<.05$ ; \*\* $p<.01$
